# Supplementary material for: Statewide Impact of COVID-19 on Social Determinants of Health - A First Look: Findings from the Survey of the Health of Wisconsin
Source: bioRxiv or medRxiv preprint supplement (doi:10.1101/2021.02.18.21252017), 2022-01-07
Supplement: Supplementary file [file media-1.pdf]

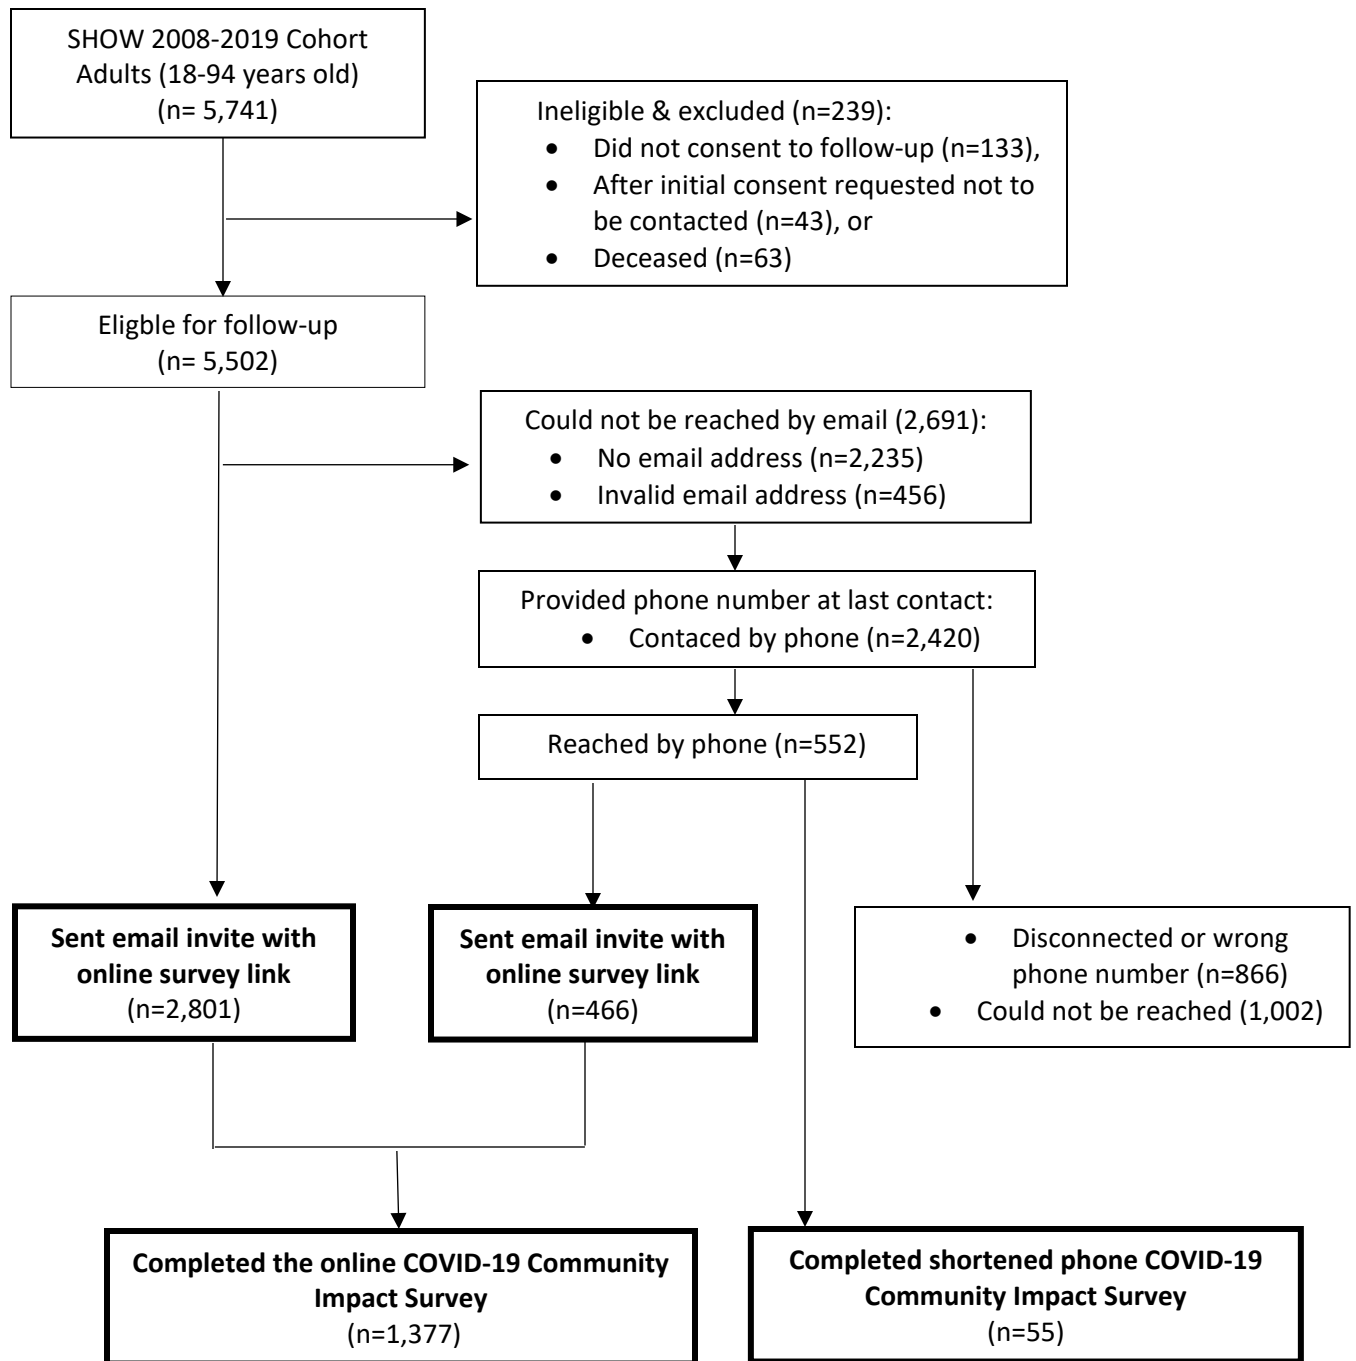

Figure 1. Flow chart of the study sample, depicting exclusion criteria and sample size.

**Table 1. Characteristics of the study population comparing respondents to non-respondents.**

|                                 | Total Eligible<br>Sample<br>(n=5737) | Respondents<br>(n = 1377) | Non-<br>respondents<br>(n = 4360) | p-trend |
|---------------------------------|--------------------------------------|---------------------------|-----------------------------------|---------|
|                                 | N                                    | %                         | %                                 |         |
| <b>Gender</b>                   |                                      |                           |                                   | <.0001  |
| Male                            | 2506                                 | 36.5                      | 43.7                              |         |
| Female                          | 3230                                 | 63.5                      | 56.3                              |         |
| <b>Current Age (in years)</b>   |                                      |                           |                                   | 0.3788  |
| 18-39                           | 1144                                 | 18.6                      | 20.4                              |         |
| 40-59                           | 2005                                 | 35.3                      | 35.1                              |         |
| 60-94                           | 2572                                 | 46.1                      | 44.5                              |         |
| <b>Race</b>                     |                                      |                           |                                   | <.0001  |
| White (non-Hispanic)            | 4508                                 | 86.7                      | 76.2                              |         |
| AA (non-Hispanic)               | 726                                  | 7.6                       | 14.3                              |         |
| Hispanic                        | 202                                  | 2.3                       | 3.9                               |         |
| Other (non-Hispanic)            | 289                                  | 3.4                       | 5.6                               |         |
| <b>Education</b>                |                                      |                           |                                   | <.0001  |
| H.S./GED or less                | 502                                  | 2.3                       | 10.8                              |         |
| Some college                    | 3373                                 | 48.9                      | 61.9                              |         |
| Bachelors or higher             | 1861                                 | 48.9                      | 27.3                              |         |
| <b>Household Income</b>         |                                      |                           |                                   | <.0001  |
| < \$25,000                      | 846                                  | 13.5                      | 29.2                              |         |
| \$25,000 - \$49,999             | 829                                  | 22.3                      | 24.7                              |         |
| \$50,000 - \$99,999             | 1096                                 | 35.7                      | 30.0                              |         |
| >\$99,999                       | 685                                  | 28.6                      | 16.1                              |         |
| <b>Household size</b>           |                                      |                           |                                   | <.0001  |
| 1                               | 810                                  | 16.6                      | 26.7                              |         |
| 2                               | 1393                                 | 46.6                      | 37.8                              |         |
| 3-4                             | 885                                  | 26.7                      | 25.4                              |         |
| 5+                              | 348                                  | 10.1                      | 10.1                              |         |
| <b>Urbanicity</b>               |                                      |                           |                                   | 0.5117  |
| Urban                           | 3480                                 | 68.5                      | 67.6                              |         |
| Rural                           | 1845                                 | 31.5                      | 32.4                              |         |
| <b>Self-reported Health</b>     |                                      |                           |                                   | <.0001  |
| Excellent                       | 443                                  | 12.2                      | 8.6                               |         |
| Very Good                       | 1922                                 | 48.3                      | 38.8                              |         |
| Good                            | 1708                                 | 31.8                      | 38.6                              |         |
| Fair                            | 476                                  | 6.7                       | 11.5                              |         |
| Poor                            | 94                                   | 0.9                       | 2.5                               |         |
| <b>Chronic Health Condition</b> |                                      |                           |                                   |         |
| Asthma and/or COPD              | 698                                  | 11.4                      | 12.4                              | 0.3658  |
| Cardiovascular disease          | 2048                                 | 34.1                      | 36.1                              | 0.2289  |
| Diabetes (any type)             | 548                                  | 6.6                       | 10.5                              | <.0001  |

AA: African American; N: number; H.S.: high school; GED: General Education Development test; COPD: Chronic Obstructive Pulmonary Disease

p-trend: statistically significant difference of demographics by response to COVID-19 survey using Chi-square test

Urbanicity: considered rural if residence located in rural census block group defined by the U.S. Census Bureau as having fewer than 2,500 people

Cardiovascular disease: if reported history of heart failure, heart attack, angina, stroke, high cholesterol, or transient ischemic attack

Asthma/COPD: self-reported current asthma, asthma episode(s) in last 12 months, or current asthma treatment

**Supplementary Table 2.** Percentage of respondents who have done the following mitigation behaviors by education level.

|                                                                                                                                                                                          | <b>Survey Sample<br/>(n = 1377)<br/>n (%)</b> | <b>White<br/>(n=944)<br/>n (%)</b> | <b>Non-White<br/>(n=433)<br/>n (%)</b> | <b>P-trend</b> |
|------------------------------------------------------------------------------------------------------------------------------------------------------------------------------------------|-----------------------------------------------|------------------------------------|----------------------------------------|----------------|
| <b>Do you think you may have had COVID-19 at any time since COVID-19 began?</b>                                                                                                          |                                               |                                    |                                        | 0.0003         |
| Yes                                                                                                                                                                                      | 128 (11.0)                                    | 97 (9.6)                           | 31 (20)                                |                |
| No                                                                                                                                                                                       | 1036 (89.0)                                   | 912 (90.4)                         | 124 (80)                               |                |
| <b>Have you been told by a health care professional that you have or had COVID-19?</b>                                                                                                   |                                               |                                    |                                        | 0.022          |
| Yes                                                                                                                                                                                      | 9 (1)                                         | 5 (0.42)                           | 4 (2.2)                                |                |
| No                                                                                                                                                                                       | 1361 (99)                                     | 1183 (99.6)                        | 178 (97.8)                             |                |
| <b>Have you ever been tested for COVID-19?</b>                                                                                                                                           |                                               |                                    |                                        | <0.0001        |
| Yes                                                                                                                                                                                      | 94 (6.8)                                      | 68 (5.7)                           | 26 (14.2)                              |                |
| No                                                                                                                                                                                       | 1280 (93.2)                                   | 1123 (94.3)                        | 157 (85.8)                             |                |
| <b>What were the test results?</b>                                                                                                                                                       |                                               |                                    |                                        | 0.58           |
| Positive                                                                                                                                                                                 | 4 (4.3)                                       | 2 (2.9)                            | 2 (7.7)                                |                |
| Negative                                                                                                                                                                                 | 70 (74.5)                                     | 51 (75)                            | 19 (73)                                |                |
| Still waiting for results                                                                                                                                                                | 20 (21.3)                                     | 15 (22.1)                          | 5 (19.2)                               |                |
| <b>Did you try to get tested but were turned away?</b>                                                                                                                                   |                                               |                                    |                                        | 0.016          |
| Yes                                                                                                                                                                                      | 28 (2.2)                                      | 20 (1.8)                           | 8 (5.1)                                |                |
| No                                                                                                                                                                                       | 1248 (97.8)                                   | 1099 (98.2)                        | 149 (94.9)                             |                |
| <b>Contacted by health professional about potential exposure to COVID-19</b>                                                                                                             |                                               |                                    |                                        | <0.0001        |
| Yes                                                                                                                                                                                      | 50 (3.7)                                      | 33 (2.8)                           | 17 (9.6)                               |                |
| No                                                                                                                                                                                       | 1310 (96.3)                                   | 1149 (97.2)                        | 161 (90.4)                             |                |
| <b>If you were diagnosed with COVID-19, or believe you had COVID-19, were you afraid or embarrassed to disclose this information to your friends or employer?</b>                        |                                               |                                    |                                        | <0.0001        |
| Yes                                                                                                                                                                                      | 32 (2.3)                                      | 22 (1.9)                           | 10 (5.7)                               |                |
| No                                                                                                                                                                                       | 617 (45.7)                                    | 518 (44.1)                         | 99 (55.9)                              |                |
| N/A                                                                                                                                                                                      | 702 (52.0)                                    | 634 (54)                           | 68 (38.4)                              |                |
| <b>During the COVID-19 outbreak, do or did you experience stigma or discrimination from other people because of your identity, having symptoms or other factors related to COVID-19?</b> |                                               |                                    |                                        | 0.005          |
| Yes                                                                                                                                                                                      | 80 (6.3)                                      | 61 (5.5)                           | 19 (11.5)                              |                |
| No                                                                                                                                                                                       | 1192 (93.7)                                   | 1045 (94.5)                        | 147 (88.5)                             |                |

Column percents shown.

p-trend: statistically significant difference of demographics by race using Chi-square test

**Supplementary Table 3.** (a) Percentage of respondents who perceive the following as “Somewhat effective or “Very effective” at keeping them safe from COVID-19. (b) Percentage of respondents who self-reported having done the following mitigation behaviors by highest education level attained.

| <b>(a) How effective are the following actions are at preventing you from getting COVID-19?</b><br><i>(select all that apply)</i> | <b>Survey Sample</b><br><b>(n = 1377)</b><br><b>%</b> | <b>&lt;= H.S. / G.E.D/ Some College</b><br><b>(n=680)</b><br><b>%</b> | <b>Bachelor’s, Graduate or Professional</b><br><b>(n=697)</b><br><b>%</b> |
|-----------------------------------------------------------------------------------------------------------------------------------|-------------------------------------------------------|-----------------------------------------------------------------------|---------------------------------------------------------------------------|
| Doing nothing                                                                                                                     | 17%                                                   | 21%                                                                   | 12%                                                                       |
| Avoiding outside exercise                                                                                                         | 19%                                                   | 23%                                                                   | 15%                                                                       |
| Praying                                                                                                                           | 48%                                                   | 57%                                                                   | 39%                                                                       |
| Getting tested for COVID19                                                                                                        | 53%                                                   | 49%                                                                   | 56%                                                                       |
| Wearing a facemask                                                                                                                | 84%                                                   | 84%                                                                   | 85%                                                                       |
| Social distancing                                                                                                                 | 94%                                                   | 93%                                                                   | 94%                                                                       |
| Avoiding public spaces & gatherings                                                                                               | 94%                                                   | 93%                                                                   | 96%                                                                       |
| Washing hands                                                                                                                     | 98%                                                   | 98%                                                                   | 99%                                                                       |
| <b>(b) Have you done any of the following because of COVID-19?</b><br><i>(select all that apply)</i>                              | <b>Survey Sample</b><br><b>(n = 1377)</b>             | <b>&lt;= H.S. / G.E.D/ Some College</b><br><b>(n=680)</b>             | <b>Bachelor’s, Graduate or Professional</b><br><b>(n=697)</b>             |
| Doing nothing                                                                                                                     | 17%                                                   | 21%                                                                   | 12%                                                                       |
| Avoiding outside exercise                                                                                                         | 19%                                                   | 23%                                                                   | 15%                                                                       |
| Praying                                                                                                                           | 48%                                                   | 57%                                                                   | 39%                                                                       |
| Getting tested for COVID19                                                                                                        | 53%                                                   | 49%                                                                   | 56%                                                                       |
| Wearing a facemask                                                                                                                | 84%                                                   | 84%                                                                   | 85%                                                                       |
| Social distancing                                                                                                                 | 94%                                                   | 93%                                                                   | 94%                                                                       |
| Avoiding public spaces & gatherings                                                                                               | 94%                                                   | 93%                                                                   | 96%                                                                       |
| Washing hands                                                                                                                     | 98%                                                   | 98%                                                                   | 99%                                                                       |
| Self-quarantined                                                                                                                  | 32%                                                   | 29%                                                                   | 33%                                                                       |
| Stayed at home most of the time                                                                                                   | 89%                                                   | 83%                                                                   | 91%                                                                       |
| Practiced social distancing (6 ft)                                                                                                | 93%                                                   | 88%                                                                   | 95%                                                                       |
| Routinely washed hands (>= 20 secs.)                                                                                              | 88%                                                   | 84%                                                                   | 89%                                                                       |
| Worn a mask                                                                                                                       | 89%                                                   | 86%                                                                   | 90%                                                                       |
| Avoided shaking hands                                                                                                             | 89%                                                   | 83%                                                                   | 91%                                                                       |
| Visited elderly relatives                                                                                                         | 10%                                                   | 9%                                                                    | 10%                                                                       |
| Visited friends or relatives                                                                                                      | 23%                                                   | 22%                                                                   | 23%                                                                       |
| Bought food for elderly relatives                                                                                                 | 14%                                                   | 13%                                                                   | 13%                                                                       |
| Bought food for friends and family                                                                                                | 17%                                                   | 17%                                                                   | 17%                                                                       |
| Taken your temperature regularly                                                                                                  | 20%                                                   | 23%                                                                   | 16%                                                                       |
| Took public transportation to work                                                                                                | 1%                                                    | 1%                                                                    | 0%                                                                        |
| Cancelled a social gathering                                                                                                      | 57%                                                   | 50%                                                                   | 63%                                                                       |
| Cancelled travel plans                                                                                                            | 54%                                                   | 43%                                                                   | 62%                                                                       |
| None of these                                                                                                                     | 1%                                                    | 0%                                                                    | 1%                                                                        |
| Other                                                                                                                             | 4%                                                    | 2%                                                                    | 5%                                                                        |

**Supplementary Table 4.** Current employment status (n=1377) by employment or school status prior to COVID-19.

| What is your job or employment status right now? (May/June 2020) | Total (n=1377)<br>n (%) | Did you have a paid job and/or were you in school before COVID-19? |                     |
|------------------------------------------------------------------|-------------------------|--------------------------------------------------------------------|---------------------|
|                                                                  |                         | Yes (n=821)<br>n (%)                                               | No (n=556)<br>n (%) |
| Working full-time for pay                                        | 543 (39)                | 519 (96)                                                           | 24 (4)              |
| Retired and not looking for a job                                | 463 (33)                | 31 (7)                                                             | 432 (93)            |
| Working part-time for pay                                        | 150 (11)                | 144 (96)                                                           | 6 (4)               |
| Other                                                            | 98 (7)                  | 62 (63)                                                            | 36 (37)             |
| Not working for pay and not looking for a job                    | 85 (6)                  | 39 (46)                                                            | 46 (54)             |
| Not working for pay and looking for a job                        | 39 (2.8)                | 25 (64)                                                            | 14 (35.9)           |
| Student                                                          | 13 (0.9)                | 10 (77)                                                            | 3 (23)              |

**Supplementary Table 5.** (a) Percent who delayed getting care for the following reasons (n= 1377), (b) Among those who experienced delay in care (n=603), the percent who reported the type of appointments and/or procedures missed. (c) Percent who indicated there was a time when they needed the following but could not get it because of COVID-19 (n=1377), (d) The percent who received telemedicine or telehealth since COVID-19 began (n=1377). Participant is considered to reside in rural location if residence is located in rural census block group defined by the U.S. Census Bureau as having fewer than 2,500 people.

| <b>(a) Have you delayed getting care of any of the following reasons due to COVID-19?</b><br><i>(select all that apply)</i>                                                             | <b>Survey Sample<br/>(n = 1377)</b><br>% | <b>Urban<br/>(n=944)</b><br>% | <b>Rural<br/>(n=433)</b><br>% |
|-----------------------------------------------------------------------------------------------------------------------------------------------------------------------------------------|------------------------------------------|-------------------------------|-------------------------------|
| No Delay in care                                                                                                                                                                        | 56%                                      | 54.6%                         | 59.1%                         |
| Postponed or cancelled due to COVID-19                                                                                                                                                  | 34%                                      | 34.4%                         | 34.4%                         |
| Afraid to get care because of COVID-19                                                                                                                                                  | 8.9%                                     | 8.8%                          | 9.0%                          |
| Could not get an appointment soon enough                                                                                                                                                | 5.1%                                     | 5.0%                          | 5.3%                          |
| Clinic/office not open when arrived                                                                                                                                                     | 2.4%                                     | 2.5%                          | 2.1%                          |
| Could not get through on the telephone                                                                                                                                                  | 1.2%                                     | 1.2%                          | 1.4%                          |
| Did not have transportation                                                                                                                                                             | 0.7%                                     | 0.9%                          | 0.2%                          |
| Went, but wait was too long                                                                                                                                                             | 0.6%                                     | 0.7%                          | 0.2%                          |
| Other                                                                                                                                                                                   | 2.5%                                     | 2.7%                          | 2.3%                          |
| Don't know                                                                                                                                                                              | 1.9%                                     | 2.2%                          | 1.2%                          |
| <b>(b) Those who experienced delay in care, Which of the following types of healthcare appointments were delayed or canceled due to the COVID-19?</b><br><i>(select all that apply)</i> | <b>Survey Sample<br/>(n = 603)</b><br>%  | <b>Urban<br/>(n=429)</b><br>% | <b>Rural<br/>(n=177)</b><br>% |
| Eye doc/optometrist                                                                                                                                                                     | 18%                                      | 19%                           | 17%                           |
| Mammogram <sup>a</sup>                                                                                                                                                                  | 18%                                      | 14%                           | 27%                           |
| Blood draw                                                                                                                                                                              | 11%                                      | 10%                           | 14%                           |
| Pap smear/cervical cancer screening <sup>a</sup>                                                                                                                                        | 7%                                       | 7%                            | 8%                            |
| Skin mole/skin cancer screening                                                                                                                                                         | 6%                                       | 7%                            | 6%                            |
| PT/occupational Therapy                                                                                                                                                                 | 6%                                       | 7%                            | 5%                            |
| Colonoscopy                                                                                                                                                                             | 5%                                       | 3%                            | 7%                            |
| Chiropractor                                                                                                                                                                            | 5%                                       | 6%                            | 3%                            |
| Allergy                                                                                                                                                                                 | 2%                                       | 2%                            | 2%                            |
| Asthma or COPD                                                                                                                                                                          | 1%                                       | 2%                            | 1%                            |
| Cardiac rehab                                                                                                                                                                           | 0%                                       | 1%                            | 0%                            |
| Lung cancer screening/CT/chest x-ray                                                                                                                                                    | 0%                                       | 1%                            | 0%                            |
| <b>(c) Was there any time when you needed any of the following but could not get it because of COVID-19?</b><br><i>(select all that apply)</i>                                          | <b>Survey Sample<br/>(n = 1377)</b><br>% | <b>Urban<br/>(n=944)</b><br>% | <b>Rural<br/>(n=433)</b><br>% |
| Regular Health Care                                                                                                                                                                     | 22%                                      | 23%                           | 20%                           |
| Dental Care                                                                                                                                                                             | 35%                                      | 34%                           | 36%                           |
| Eyeglasses                                                                                                                                                                              | 13%                                      | 13%                           | 12%                           |
| Mental Health care                                                                                                                                                                      | 3%                                       | 3%                            | 2%                            |
| Prescription Medication                                                                                                                                                                 | 3%                                       | 3%                            | 2%                            |

|                                                                              |                             |                                     |                          |                          |
|------------------------------------------------------------------------------|-----------------------------|-------------------------------------|--------------------------|--------------------------|
|                                                                              | None of These<br>Don't know | 49%<br>1%                           | 48%<br>1%                | 52%<br>0%                |
| <b>(d) Since COVID-19 began, did you receive telemedicine or telehealth?</b> |                             | <b>Survey Sample<br/>(n = 1377)</b> | <b>Urban<br/>(n=944)</b> | <b>Rural<br/>(n=433)</b> |
|                                                                              |                             | <b>%</b>                            | <b>%</b>                 | <b>%</b>                 |
|                                                                              | Yes                         | 22                                  | 22                       | 21                       |
|                                                                              | No                          | 78                                  | 78                       | 79                       |

<sup>a</sup>Only asked among those self-identified as female and reported a delay in care due to COVID-19 (n=432)

**Supplementary Table 6. The impact of COVID-19 on health-related behaviors by gender<sup>a</sup> (a-c)**

Respondents reported the degree to which their physical activity level, alcohol consumption and smoking quantity changed since COVID-19 began, compared to before COVID-19. Only current alcohol consumers (n= ) and smokers (n= ) were asked about changes in their alcohol and smoking quantity. (d) Percentage of respondents who reported doing the following activities to help cope with stress from COVID-19. (a-d) n=5 nonconforming/transgender were excluded because too few in self-identified gender category to look at separately in this analyses.

| <b>(a) How has your overall level of physical activity changed due to COVID-19?</b>                                      | <b>Survey Sample<br/>(n = 1367)<br/>%</b> | <b>Male<br/>(n=502)<br/>%</b> | <b>Female<br/>(n=865)<br/>%</b> |
|--------------------------------------------------------------------------------------------------------------------------|-------------------------------------------|-------------------------------|---------------------------------|
| A lot more                                                                                                               | 17%                                       | 13%                           | 20%                             |
| A little more                                                                                                            | 27%                                       | 26%                           | 27%                             |
| About the same                                                                                                           | 33%                                       | 41%                           | 29%                             |
| A little lower                                                                                                           | 16%                                       | 14%                           | 17%                             |
| Much lower                                                                                                               | 6%                                        | 5%                            | 7%                              |
| <b>(b) In the last 60 days during COVID-19, would you say the amount of alcohol you drink now compared to before is:</b> | <b>Survey Sample<br/>(n = 1285)<br/>%</b> | <b>Male<br/>(n=468)<br/>%</b> | <b>Female<br/>(n=817)<br/>%</b> |
| A lot more                                                                                                               | 5%                                        | 4%                            | 6%                              |
| A little more                                                                                                            | 18%                                       | 16%                           | 19%                             |
| About the same                                                                                                           | 61%                                       | 65%                           | 59%                             |
| A little lower                                                                                                           | 7%                                        | 6%                            | 7%                              |
| Much lower                                                                                                               | 9%                                        | 9%                            | 9%                              |
| <b>(c) In the last 60 days during COVID-19, how would you compare your smoking/vaping now to before COVID-19:</b>        | <b>Survey Sample<br/>(n = 115)<br/>%</b>  | <b>Male<br/>(n=38)<br/>%</b>  | <b>Female<br/>(n=77)<br/>%</b>  |
| A lot more                                                                                                               | 14%                                       | 8%                            | 16%                             |
| A little more                                                                                                            | 30%                                       | 24%                           | 34%                             |
| About the same                                                                                                           | 47%                                       | 61%                           | 42%                             |
| A little lower                                                                                                           | 5%                                        | 5%                            | 5%                              |
| Much lower                                                                                                               | 3%                                        | 3%                            | 4%                              |
| <b>(d) Since COVID-19, have you done any of the following as a way to cope with COVID-19? (select all that apply)</b>    | <b>Survey Sample<br/>(n = 1369)<br/>%</b> | <b>Male<br/>(n=497)<br/>%</b> | <b>Female<br/>(n=872)<br/>%</b> |
| None of these                                                                                                            | 3%                                        | 4%                            | 2%                              |
| Wrote in a journal                                                                                                       | 8%                                        | 5%                            | 11%                             |
| Meditating                                                                                                               | 11%                                       | 7%                            | 14%                             |
| Yoga                                                                                                                     | 12%                                       | 5%                            | 15%                             |
| Worked on art projects                                                                                                   | 23%                                       | 8%                            | 31%                             |
| Attended online religious/spiritual event                                                                                | 34%                                       | 27%                           | 37%                             |
| Prayer                                                                                                                   | 39%                                       | 27%                           | 46%                             |
| Exercised/worked out                                                                                                     | 43%                                       | 42%                           | 44%                             |
| Played music                                                                                                             | 48%                                       | 38%                           | 53%                             |
| Read books for pleasure                                                                                                  | 49%                                       | 36%                           | 57%                             |
| Played games (online, card, board)                                                                                       | 53%                                       | 46%                           | 57%                             |
| Baked and cooked                                                                                                         | 60%                                       | 39%                           | 72%                             |



|                                    |     |     |     |
|------------------------------------|-----|-----|-----|
| Video call with friends/family     | 61% | 51% | 66% |
| Watched online movies/shows        | 63% | 61% | 64% |
| Gardened/home improvement projects | 64% | 60% | 66% |
| Took walks outside                 | 71% | 66% | 74% |
| Watched television                 | 79% | 75% | 81% |

---

**Supplementary Table 7a. Children in the home and caregiving during COVID-19.** Percent of adults who report having children in the home, caregiving for children and/or adults during COVID-19.

| <b>Have one or more children (&lt; 18 years of age) living in your home:</b>                                                                                              | <b>Survey Sample<br/>(n = 1359)<br/>N (%)</b> |
|---------------------------------------------------------------------------------------------------------------------------------------------------------------------------|-----------------------------------------------|
| Yes                                                                                                                                                                       | 404 (30)                                      |
| No                                                                                                                                                                        | 955 (70)                                      |
| <i>Among those with children &lt;18 years of age in the home,</i><br><b>Do you currently care for any of the children in your household during the COVID-19 pandemic?</b> | <b>(n = 401)<br/>N %</b>                      |
| Yes                                                                                                                                                                       | 352 (88)                                      |
| No                                                                                                                                                                        | 49 (12)                                       |
| <b>Are you currently providing care for an adult (18+ years of age) in your household that has an illness or a disability?</b>                                            | <b>(n = 1158)<br/>%</b>                       |
| Yes                                                                                                                                                                       | 70 (6)                                        |
| No                                                                                                                                                                        | 1088 (94)                                     |

**Supplementary Table 7b. Stress during COVID-19 by the status of children in the home.** Percent of adults who self-reported experiencing moderate to high levels of stress in the following areas of their life due to COVID-19 (n=1376), comparing adults with children <18 years of age in the home to adults without children <18 years of age in the home.

| <b>Due to COVID-19, how much stress did you experience...<br/>(select all that apply)</b> | <b>Percent who self-reported experiencing moderate to high level of stress</b> |                                                                     |                                                                           |
|-------------------------------------------------------------------------------------------|--------------------------------------------------------------------------------|---------------------------------------------------------------------|---------------------------------------------------------------------------|
|                                                                                           | <b>Survey Sample<br/>(n = 1377)</b>                                            | <b>Adults with Children<sup>a</sup><br/>in the home<br/>(n=680)</b> | <b>Adults <u>without</u> Children<sup>a</sup> in the home<br/>(n=697)</b> |
| Related to legal problems                                                                 | 4%                                                                             | 6%                                                                  | 2%                                                                        |
| Related to racism and discrimination                                                      | 4%                                                                             | 8%                                                                  | 3%                                                                        |
| Related to living in your neighborhood                                                    | 7%                                                                             | 9%                                                                  | 7%                                                                        |
| Related to meeting basic needs                                                            | 10%                                                                            | 18%                                                                 | 7%                                                                        |
| Related to caring for others                                                              | 15%                                                                            | 23%                                                                 | 12%                                                                       |
| Related to medical problems                                                               | 16%                                                                            | 18%                                                                 | 14%                                                                       |
| Related to loss of money or finances                                                      | 19%                                                                            | 24%                                                                 | 17%                                                                       |
| In your relationship with others                                                          | 25%                                                                            | 37%                                                                 | 20%                                                                       |
| In your job                                                                               | 34%                                                                            | 53%                                                                 | 26%                                                                       |

<sup>a</sup>Children includes anyone < 18 years of age
